# Supplementary material
Source: publisher figshare collection journal article supplement (https://sage.figshare.com/ndownloader/files/12540224)
Supplement: Supplementary file 1 [file 12540224]

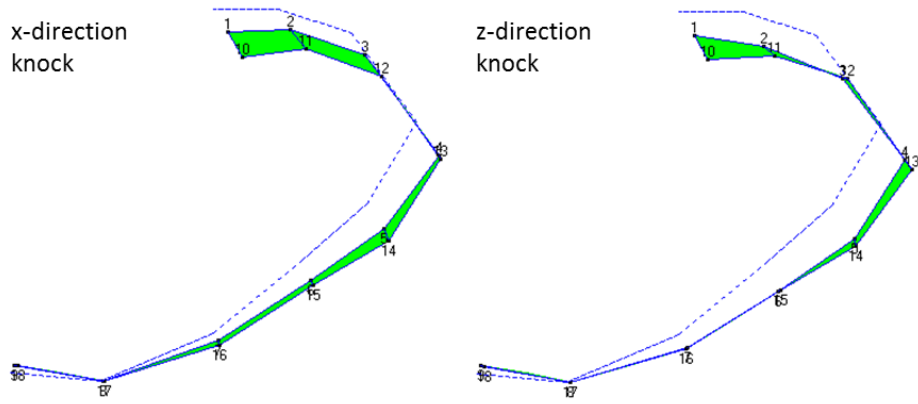

Figure S1: First bending mode of 1LO at 3.94Hz and 3.90Hz with free-free boundary condition knocked in X&Z-direction respectively

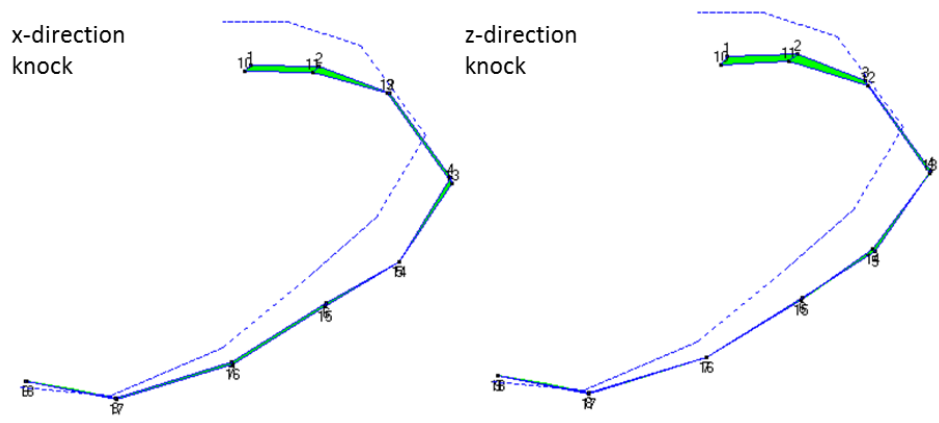

Figure S2: First bending mode of 2LO at 4.02Hz and 4.04Hz with free-free boundary condition knocked in X and Z-direction respectively

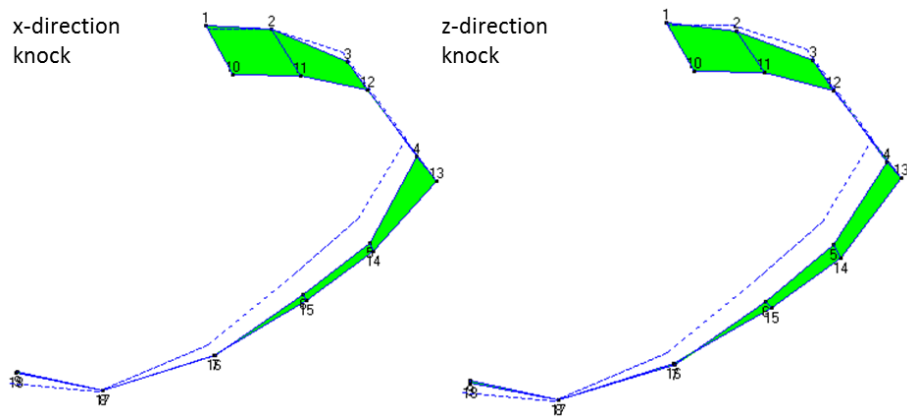

Figure S3: First bending mode of 3LO at 4.13Hz and 4.14Hz with free-free boundary condition knocked in X and Z-direction respectively

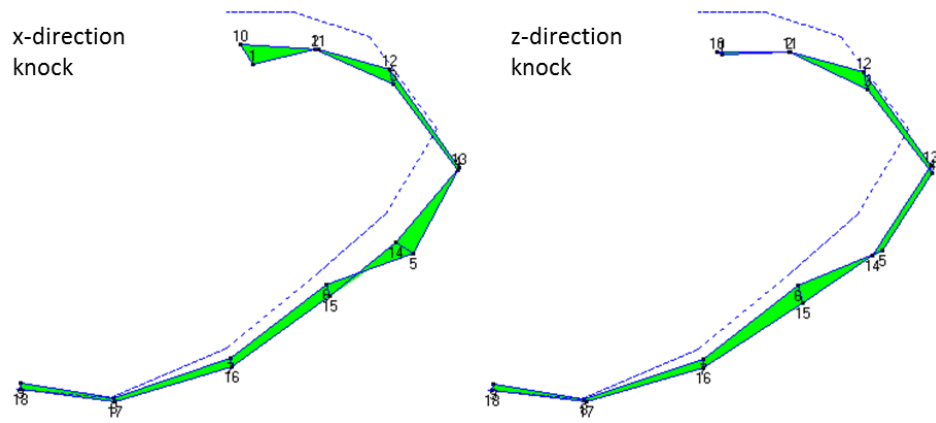

Figure S4: First bending mode of 4LO at 4.24Hz with free-free boundary condition knocked in X and Z-direction respectively

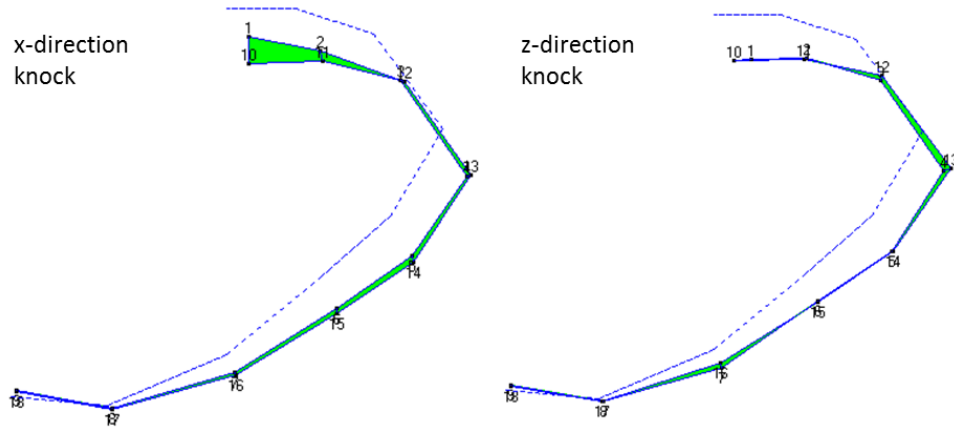

Figure S5: First bending mode of 5LO at 4.64Hz with free-free boundary condition knocked in x and Z-direction respectively

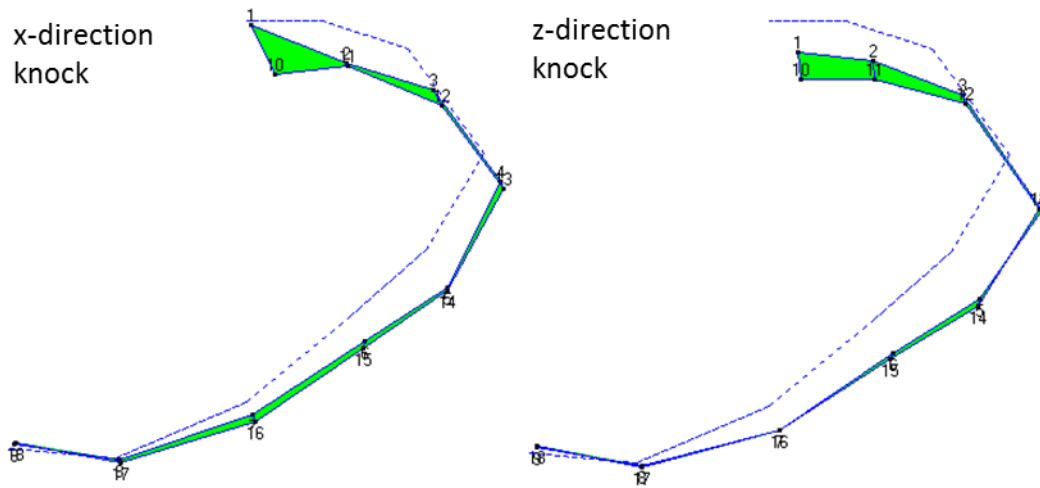

Figure S6: First bending mode of 6LO at 4.87Hz and 4.78Hz with free-free boundary condition knocked in X and Z-direction respectively

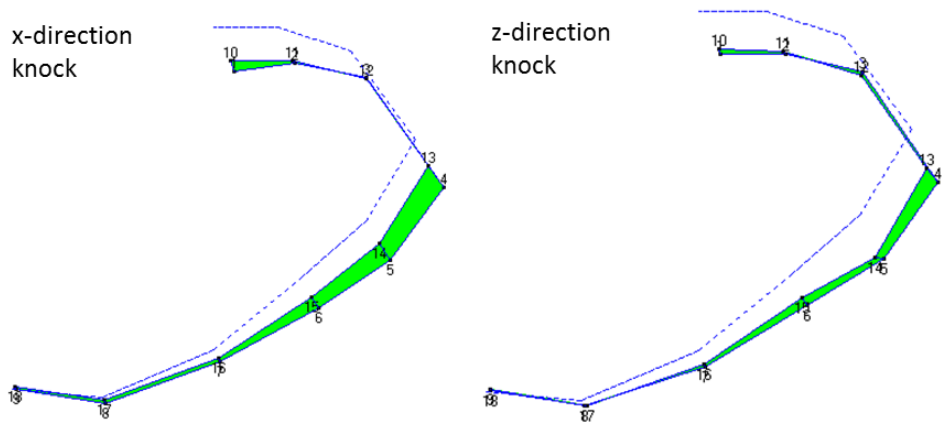

Figure S7: First bending mode of 7LO at 5.04Hz and 5.00Hz with free-free boundary condition knocked in X and Z-direction respectively

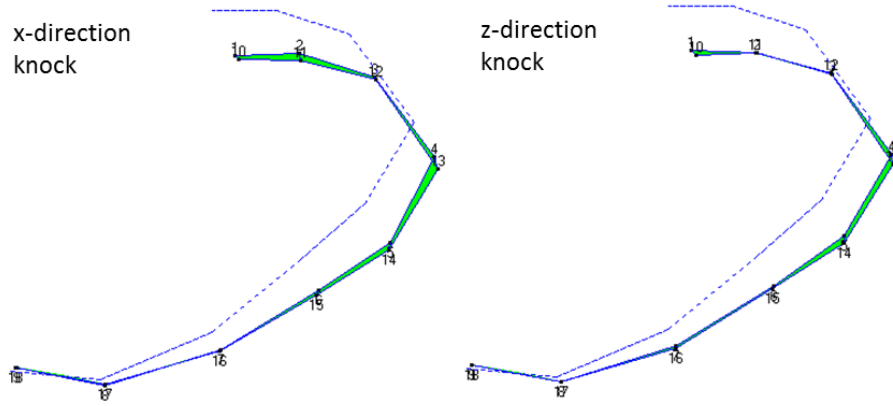

Figure S8: First bending mode of 8LO at 5.21Hz and 5.22Hz with free-free boundary condition knocked in X and Z-direction respectively



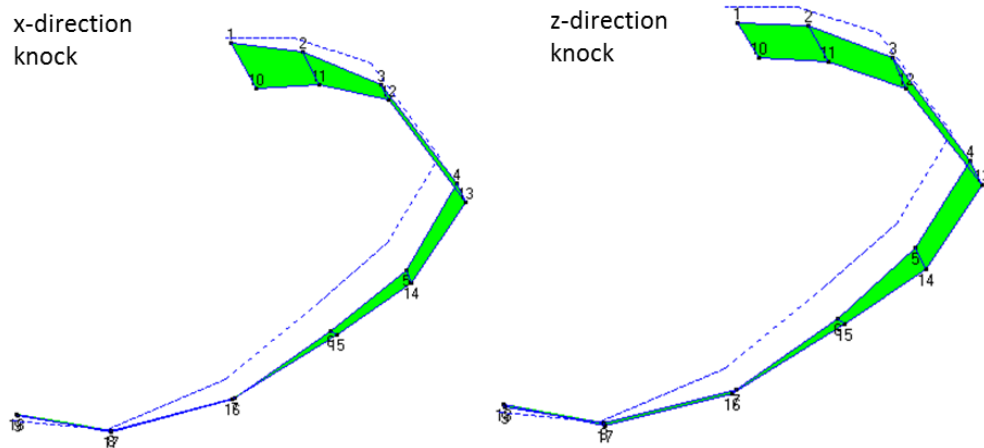

Figure S9: First bending mode of 9LO at 5.29Hz and 5.33Hz with free-free boundary condition knocked in X and Z-direction respectively
